# Supplementary material
Source: PubMed Central journal article supplement (PMC4059163)
Supplement: supp_M113.522565_jbc.M113.522565-1.pdf [file supp_M113.522565_jbc.M113.522565-1.pdf]

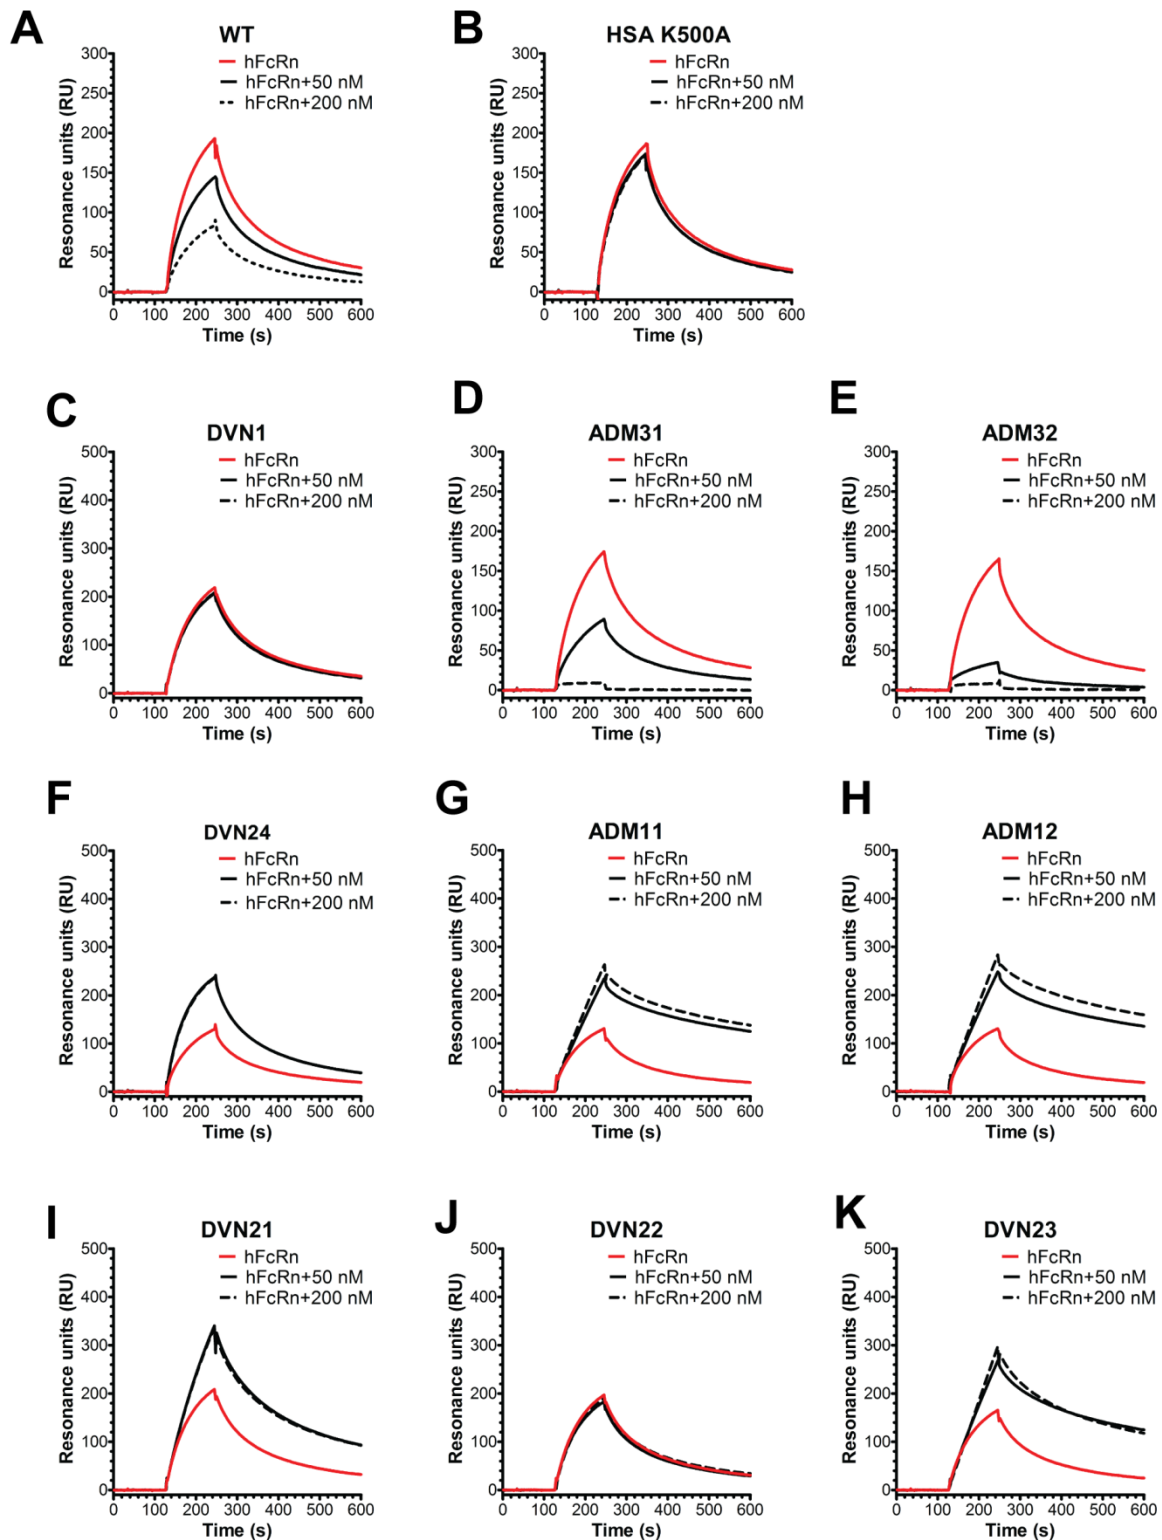

**Figure S2. Competitive SPR binding analysis of hFcRn to HSA in the presence of HSA, HSAK500A or anti-FcRn Abs.**

Representative SPR sensorgrams showing binding of 200 nM of hFcRn injected alone or in the presence of 50-200 nM of (A) WT HSA, (B) HSA-K500A or (C-K) monoclonal Abs as indicated over immobilized WT HSA (1500 RU) at pH 6.0. All injections were done at 25°C with a flow rate of 50  $\mu$ l/min.
